# Supplementary material for: Testing ion exchange resin for quantifying bulk and throughfall deposition of macro- and micro-elements in forests
Source: Copernicus journal article supplement (doi:10.5194/amt-17-6579-2024), 2024-11-18
Supplement: Supplementary file 1 [file amt-17-6579-2024-supplement.pdf]

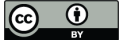

*Supplement of*

## **Testing ion exchange resin for quantifying bulk and throughfall deposition of macro- and micro-elements in forests**

**Marleen A. E. Vos et al.**

*Correspondence to:* Marleen A. E. Vos ([marleen.vos@wur.nl](mailto:marleen.vos@wur.nl))

The copyright of individual parts of the supplement might differ from the article licence.

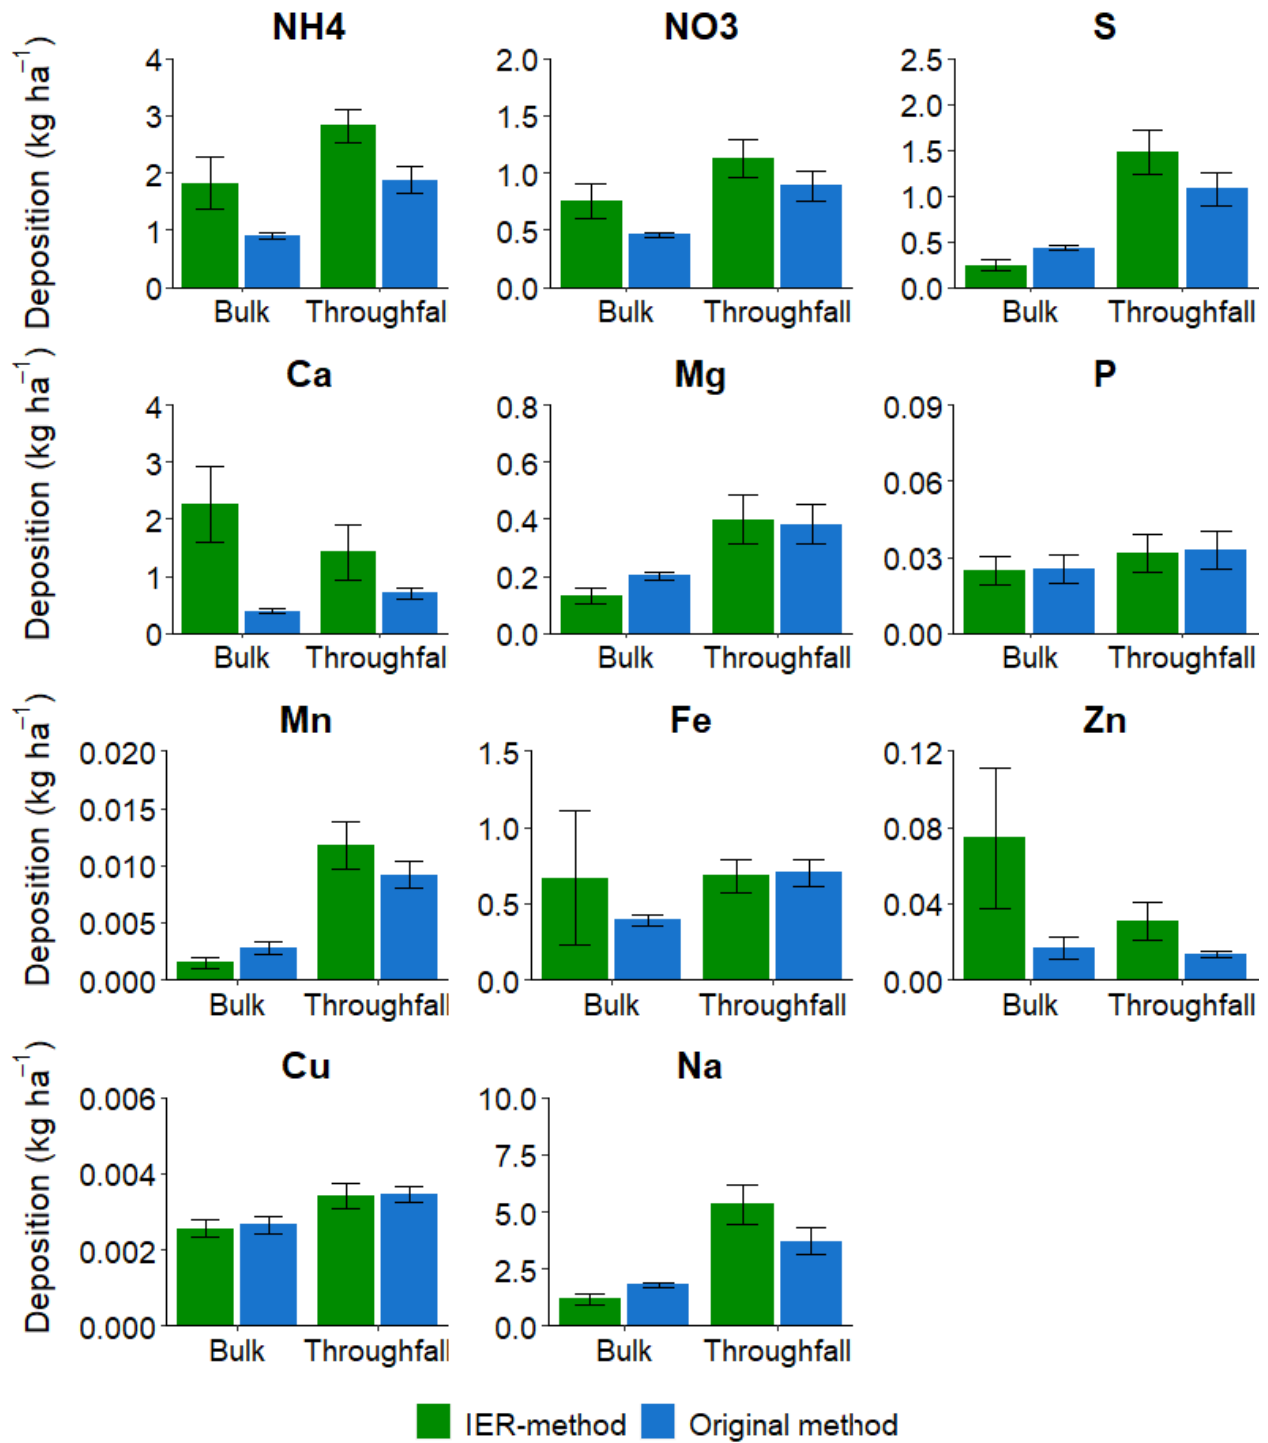

Figure S1: Deposition estimates of the IER-method (kg ha<sup>-1</sup>) and the original water-method (kg ha<sup>-1</sup>) in for the bulk deposition and the throughfall for a 10-week measurement period.

**Table S1: Ratios of throughfall (mostly also including stemflow, SF) to bulk deposition reported in literature, where throughfall consists of wet deposition and dry deposition corrected for canopy uptake while bulk deposition consists of the wet deposition including a small fraction of dry deposition.**

| Species       | Na  | NH <sub>4</sub> | NO <sub>3</sub> | K   | Mg  | SO <sub>4</sub> | PO <sub>4</sub> | Ca  | Mn  | Zn  | Cu   | Country        | SF  | Source                      |
|---------------|-----|-----------------|-----------------|-----|-----|-----------------|-----------------|-----|-----|-----|------|----------------|-----|-----------------------------|
| Beech         | 1.1 | 0.84            | 1.6             | 8.6 | 3.3 | 1.6             | 2.3             | 2.1 | 21  |     |      | Germany        | Yes | (Talkner et al., 2010)      |
| Beech         | 2.3 | 1.7             | 1.6             | 38  | 4.5 | 4.7             |                 | 3.5 |     |     |      | Belgium        | Yes | (Adriaenssens et al., 2012) |
| Beech         | 1.2 | 1.3             | 1.7             | 10  | 3.5 | 1.6             |                 | 2.6 |     |     |      | Czech Republic | Yes | (Růžek et al., 2019)        |
| Beech         | 1.2 | 0.82            | 1.2             | 6.2 | 1.9 | 1.2             | 1.7             | 1.8 | 6.9 | 1.1 | 2.1  | Poland         | Yes | (Kowalska et al., 2016)     |
| Douglas fir   | 2.3 | 1.8             | 42              | 8.0 | 6.0 | 3.3             | 0.6             | 5.3 |     |     |      | France         | Yes | (Marques et al., 1997)      |
| Douglas fir   | 2.3 | 3.3             | 2.1             | 14  | 2.9 | 3.6             | 3.5             | 3.6 |     |     |      | Netherlands    | Yes | (Draaijers et al., 1997)    |
| Spruce        |     |                 |                 |     |     |                 |                 |     |     | 2.1 | 0.64 |                |     | (Bergkvist et al., 1989)    |
| Scots pine    | 2.0 | 1.1             | 1.0             | 11  | 3.4 | 1.5             | 5.6             | 1.6 | 21  | 1.1 | 1.3  | Poland         | No  | (Kowalska et al., 2016)     |
| Scots pine    | 2.5 | 3.8             | 3.4             | 4.4 | 1.1 | 1.8             |                 | 2.1 |     |     |      | Poland         | No  | (Kozłowski et al., 2020)    |
| Corsican pine | 1.5 | 3.9             | 3.1             | 3.8 | 1.9 |                 |                 | 1.4 |     |     |      | Belgium        | No  | (De Schrijver et al., 2004) |
| Average       |     |                 |                 |     |     |                 |                 |     |     |     |      |                |     |                             |
| Beech         | 1.5 | 1.2             | 1.5             | 16  | 3.3 | 2.3             | 2.0             | 2.5 | 14  | 1.1 | 2.1  |                |     |                             |
| Douglas fir   | 2.3 | 2.6             | 22              | 11  | 4.5 | 3.5             | 2.1             | 4.5 |     |     | 0.6  |                |     |                             |
| Scots pine    | 2.0 | 2.9             | 2.5             | 6.4 | 2.1 | 1.7             | 5.6             | 1.7 | 21  | 1.1 | 1.3  |                |     |                             |

N.B. The bulk throughfall deposition of SO<sub>4</sub><sup>2-</sup> was assumed to be not influenced by canopy exchange as the stomatal uptake of SO<sub>2</sub> is balanced by foliar leaching of SO<sub>4</sub><sup>2-</sup> (Draaijers and Erisman, 1995). However, Staelens et al. (2007) estimated that canopy leaching contributed 7% to the combined bulk throughfall and stemflow of SO<sub>4</sub><sup>2-</sup> which was in line with the findings of Potter et al. (1991). Canopy exchange of Al and Cu are neglectable as both elements in deposition is found in a colloidal fraction and almost entirely complexed by DOC (Gandois et al., 2010). The free metal ion forms of Zn (on average 30%) do interact with the canopy however concentration is only slightly increased or decreased (Gandois et al., 2010).

**Table S2: Overview of the columns (n = 45) prepared for the different laboratory tests.**

| Pre-treatment | Loading                       | n  | Used for adsorption tests | Used for extraction tests |
|---------------|-------------------------------|----|---------------------------|---------------------------|
| Heat          | 1 * macro- and micro solution | 3  | Yes                       | Yes                       |
| Drought       | 1 * macro- and micro solution | 3  | Yes                       | Yes                       |
| Frost         | 1 * macro- and micro solution | 3  | Yes                       | Yes                       |
| None          | 1 * macro- and micro solution | 30 | Yes, 3 columns            | Yes                       |
| None          | 2 * macro- and micro solution | 3  | Yes                       | No                        |
| None          | 3 * macro- and micro solution | 3  | Yes                       | No                        |

**Table S3: ANOVA F and P values for HCl extraction of different molarities, pre-treatments (DW or FW) and different extraction types (Drip or Shake-Drip). The post-hoc tests for the interactions are in table S6-S9.**

|                                 | DF | F-value | P-value  |
|---------------------------------|----|---------|----------|
| Element                         | 9  | 660     | < 0.0001 |
| Pre-treatment                   | 1  | 120     | < 0.0001 |
| Molarity                        | 6  | 17      | < 0.0001 |
| Extraction type                 | 1  | 4.3     | 0.040    |
| Element * Pre-treatment         | 9  | 52      | < 0.0001 |
| Element * Molarity              | 54 | 9.8     | < 0.0001 |
| Element * Extraction type       | 9  | 2.5     | 0.012    |
| Pre-treatment * Extraction type | 1  | 15      | 0.0002   |

**Table S4: Intercept and slope ( $\pm$  s.e) and the significances of the linear models comparing the elemental contents of the deposition (both throughfall and bulk deposition) between the IER-method and the common method.**

| Element         | Intercept                | Slope                |
|-----------------|--------------------------|----------------------|
| NH <sub>4</sub> | 0.062 $\pm$ 0.21 n.s.    | 1.5 $\pm$ 0.14 ***   |
| NO <sub>3</sub> | 0.081 $\pm$ 0.18 n.s.    | 1.1 $\pm$ 0.30 **    |
| S               | -0.83 $\pm$ 0.20 ***     | 2.5 $\pm$ 0.31 ***   |
| P               | 0.0053 $\pm$ 0.0078 n.s. | 0.43 $\pm$ 0.17 *    |
| K               | 0.043 $\pm$ 0.13 n.s.    | 1.6 $\pm$ 0.069 ***  |
| Ca              | 0.014 $\pm$ 1.4 n.s.     | 3.2 $\pm$ 2.6 n.s.   |
| Mg              | -0.30 $\pm$ 0.099 **     | 2.1 $\pm$ 0.40 ***   |
| Mn              | -0.0031 $\pm$ 0.0012 *   | 1.6 $\pm$ 0.15 ***   |
| Cu              | 0.0022 $\pm$ 0.00085 *   | 0.18 $\pm$ 0.27 n.s. |
| Fe              | -0.15 $\pm$ 0.35 n.s.    | 1.1 $\pm$ 0.69 n.s.  |
| Zn              | -0.014 $\pm$ 0.057 n.s.  | 4.3 $\pm$ 5.0 n.s.   |
| Na              | -4.7 $\pm$ 1.1 ***       | 3.2 $\pm$ 0.45 ***   |

\*\*\* < 0.001; \*\* 0.01 < 0.001; \* 0.05 < 0.01; n.s. is not significant

**Table S5: Elemental concentrations under detection limit (%) after 10-week long field sampling of the atmospheric bulk (throughfall) deposition in the Netherlands. Elemental concentrations were often under detection limit for the original method (Org), especially for the treatments (TM) shelterwood (SW) and clearcut (CC) and less often for the treatments control (CO) and high thinning (HT). For the Ion Exchange resin method (IER) values were less often under detection limit.**

| TM | Method | Ca  | Cu  | Fe  | K   | Mg | Mn  | Na | P   | S | Zn  | NH4 | NO3 |
|----|--------|-----|-----|-----|-----|----|-----|----|-----|---|-----|-----|-----|
| CO | Org    | 83  | 100 | 100 | 0   | 0  | 50  | 0  | 100 | 0 | 83  | 0   | 0   |
| HT | Org    | 100 | 100 | 100 | 0   | 0  | 100 | 0  | 100 | 0 | 100 | 0   | 0   |
| SW | Org    | 100 | 100 | 100 | 50  | 17 | 100 | 0  | 100 | 0 | 100 | 0   | 0   |
| CC | Org    | 100 | 100 | 100 | 100 | 33 | 100 | 0  | 100 | 0 | 83  | 0   | 0   |
| CO | IER    | 0   | 0   | 20  | 0   | 0  | 0   | 0  | 40  | 0 | 0   | 0   | 0   |
| HD | IER    | 0   | 0   | 40  | 0   | 0  | 0   | 0  | 20  | 0 | 0   | 0   | 0   |
| SK | IER    | 0   | 0   | 17  | 0   | 0  | 0   | 0  | 0   | 0 | 17  | 0   | 0   |
| KK | IER    | 0   | 0   | 0   | 0   | 0  | 0   | 0  | 60  | 0 | 20  | 0   | 0   |

**Table S6: Post-hoc test results of the interaction between the element and the pre-treatment of the resin (DW is dry weight and FW is fresh weight). The mean  $\pm$  s.e. of each extraction type is given and the p-value of the Tukey post-hoc test.**

| Extraction type | Ca            | Cu       | Fe       | K        | Mg       | Mn       | Na       | P        | S        | Zn       |
|-----------------|---------------|----------|----------|----------|----------|----------|----------|----------|----------|----------|
| Dry weight      |               | 88 $\pm$ | 88 $\pm$ | 98 $\pm$ | 91 $\pm$ | 95 $\pm$ | 98 $\pm$ | 71 $\pm$ | 87 $\pm$ | 14 $\pm$ |
|                 | 110 $\pm$ 6.1 | 3.2      | 4.7      | 2.4      | 3.2      | 3.9      | 2.6      | 6.4      | 3.8      | 3.0      |
| Fresh weight    | 57 $\pm$      | 81 $\pm$ | 72 $\pm$ | 90 $\pm$ | 70 $\pm$ | 91 $\pm$ | 92 $\pm$ | 59 $\pm$ | 94 $\pm$ | 21 $\pm$ |
|                 | 8.7           | 3.2      | 5.5      | 3.6      | 4.4      | 3.3      | 2.9      | 4.9      | 1.5      | 4.4      |
| <i>p-value</i>  | < 0.001       | 0.34     | 0.56     | 1.0      | 0.13     | 0.19     | 0.67     | 1.0      | 1.0      | 1.0      |

**Table S7: Post-hoc test results of the interaction between the element and the molarity of the extractant. The mean  $\pm$  s.e. of each extraction type is given. Significant differences between groups ( $p < 0.05$ ) based on the Tukey post-hoc test are marked with small letters.**

| Molarity  | Ca                | Cu                | Fe                 | K                | Mg               | Mn               | Na               | P                | S                | Zn               |
|-----------|-------------------|-------------------|--------------------|------------------|------------------|------------------|------------------|------------------|------------------|------------------|
| 1         | 30 $\pm$          | 80 $\pm$          | 56 $\pm$           | 88 $\pm$         | 59 $\pm$         | 91 $\pm$         | 99 $\pm$         | 62 $\pm$         | 92 $\pm$         | 17 $\pm$         |
|           | 5.2 <sup>a</sup>  | 6.3 <sup>a</sup>  | 4.2 <sup>a</sup>   | 1.1 <sup>a</sup> | 4.5 <sup>a</sup> | 6.5 <sup>a</sup> | 3.0 <sup>a</sup> | 6.5 <sup>a</sup> | 2.2 <sup>a</sup> | 3.6 <sup>a</sup> |
| 2         | 110 $\pm$         | 89 $\pm$          | 96 $\pm$           | 95 $\pm$         | 92 $\pm$         | 98 $\pm$         | 93 $\pm$         | 56 $\pm$         | 96 $\pm$         | 15 $\pm$         |
|           | 9.2 <sup>c</sup>  | 3.7 <sup>a</sup>  | 3.3 <sup>c</sup>   | 4.0 <sup>a</sup> | 4.8 <sup>a</sup> | 3.9 <sup>a</sup> | 3.8 <sup>a</sup> | 7.3 <sup>a</sup> | 2.3 <sup>a</sup> | 3.9 <sup>a</sup> |
| 2.5       | 86 $\pm$          | 78 $\pm$          | 72 $\pm$           | 100 $\pm$        | 85 $\pm$         | 81 $\pm$         | 110 $\pm$        | 95 $\pm$         | 78 $\pm$         | 6.1 $\pm$        |
|           | 1.2 <sup>ab</sup> | 0.65 <sup>a</sup> | 0.6 <sup>ab</sup>  | 3.1 <sup>a</sup> | 4.5 <sup>a</sup> | 0.2 <sup>a</sup> | 1.3 <sup>a</sup> | 0.7 <sup>a</sup> | 11 <sup>a</sup>  | 0.4 <sup>a</sup> |
| 3         | 82 $\pm$          | 71 $\pm$          | 67 $\pm$           | 98 $\pm$         | 77 $\pm$         | 77 $\pm$         | 100 $\pm$        | 87 $\pm$         | 70 $\pm$         | 6.1 $\pm$        |
|           | 5.6 <sup>ab</sup> | 6.3 <sup>a</sup>  | 8.9 <sup>ab</sup>  | 6.9 <sup>a</sup> | 9.1 <sup>a</sup> | 7.8 <sup>a</sup> | 2.8 <sup>a</sup> | 1.5 <sup>a</sup> | 1.2 <sup>a</sup> | 0.6 <sup>a</sup> |
| 3.5       | 99 $\pm$          | 89 $\pm$          | 80 $\pm$           | 88 $\pm$         | 93 $\pm$         | 96 $\pm$         | 86 $\pm$         | 87 $\pm$         | 84 $\pm$         | 11 $\pm$         |
|           | 0.0 <sup>ab</sup> | 0.45 <sup>a</sup> | 1.9 <sup>abc</sup> | 8.1 <sup>a</sup> | 1.9 <sup>a</sup> | 2.4 <sup>a</sup> | 5.2 <sup>a</sup> | 4.1 <sup>a</sup> | 6.9 <sup>a</sup> | 2.6 <sup>a</sup> |
| 4 – 2 – 1 | 94 $\pm$          | 89 $\pm$          | 95 $\pm$           | 99 $\pm$         | 84 $\pm$         | 97 $\pm$         | 88 $\pm$         | 51 $\pm$         | 97 $\pm$         | 38 $\pm$         |
|           | 6.3 <sup>bc</sup> | 3.4 <sup>a</sup>  | 3.1 <sup>bc</sup>  | 10 <sup>a</sup>  | 3.3 <sup>a</sup> | 3.6 <sup>a</sup> | 3.7 <sup>a</sup> | 3.3 <sup>a</sup> | 2.0 <sup>a</sup> | 6.1 <sup>a</sup> |

**Table S8: Post-hoc test results of the interaction between the element and the extraction type (either drip or the shake-drip method). The mean  $\pm$  s.e. of each extraction type is given and the p-value of the Tukey post-hoc test.**

| Extraction type | Ca       | Cu       | Fe       | K        | Mg       | Mn       | Na       | P        | S        | Zn        |
|-----------------|----------|----------|----------|----------|----------|----------|----------|----------|----------|-----------|
| Drip            | 73 $\pm$ | 84 $\pm$ | 78 $\pm$ | 92 $\pm$ | 76 $\pm$ | 93 $\pm$ | 93 $\pm$ | 54 $\pm$ | 94 $\pm$ | 25 $\pm$  |
|                 | 9.4      | 2.7      | 5.0      | 2.9      | 4.2      | 2.8      | 2.2      | 3.4      | 1.2      | 3.2       |
| Shake-drip      | 96 $\pm$ | 84 $\pm$ | 83 $\pm$ | 96 $\pm$ | 88 $\pm$ | 90 $\pm$ | 97 $\pm$ | 82 $\pm$ | 85 $\pm$ | 7.2 $\pm$ |
|                 | 6.9      | 3.8      | 4.9      | 3.4      | 4.1      | 4.4      | 3.4      | 5.0      | 4.3      | 0.78      |
| <i>p-value</i>  | 1.0      | 1.0      | 1.0      | 1.0      | 1.0      | 1.0      | 1.0      | 0.035    | 1.0      | 0.40      |

**Table S9: Post-hoc test results of the interaction between the pre-treatment of the resin (DW is dry weight and FW is fresh weight) and the extraction type (either drip or the shake-drip method). Significant differences between groups ( $p < 0.05$ ) based on the Tukey post-hoc test are marked with small letters.**

| Pre-treatment | Extraction type | Recovery efficiency (%) |
|---------------|-----------------|-------------------------|
| DW            | Drip            | 84 <sup>c</sup>         |
| DW            | Shake-drip      | 81 <sup>b</sup>         |
| FW            | Drip            | 72 <sup>ac</sup>        |
| FW            | Shake-drip      | 76 <sup>a</sup>         |
